# Supplementary material for: An Ionic Liquid Electrolyte Additive for High-Performance Lithium–Sulfur Batteries
Source: MDPI journal article supplement (doi:10.3390/ma16237504), 2023-12-04
Supplement: s1 [file s1]

Support Information

# An Ionic Liquid Electrolyte Additive for High-Performance Lithium Sulfur Battery

Zeliang Guan, Ling Bai, and Binyang Du \*

MOE Key Laboratory of Macromolecular Synthesis and Functionalization, Department of Polymer Science & Engineering, Zhejiang University, Hangzhou 310027, China; 21929001@zju.edu.cn (Z.G.); 12129056@zju.edu.cn (L.B.)

\* Correspondence: duby@zju.edu.cn

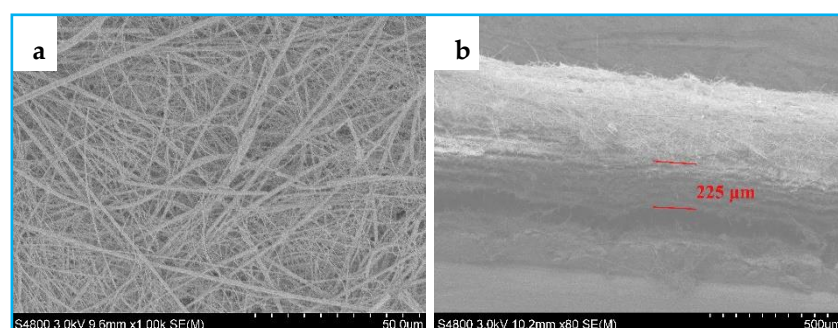

**Figure S1.** (a) SEM images of the top surface for glass fiber separator, (b) Cross-section of the glass fiber separator.

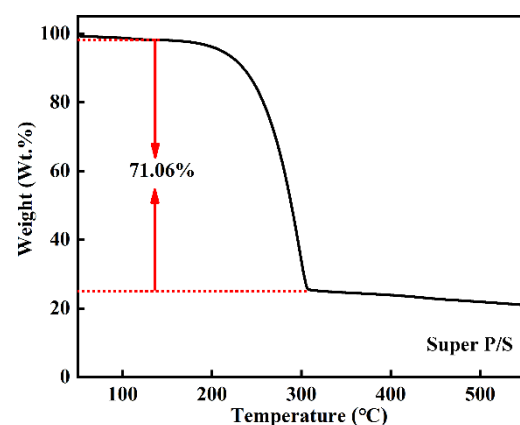

**Figure S2.** The TG curve of Super P/S.

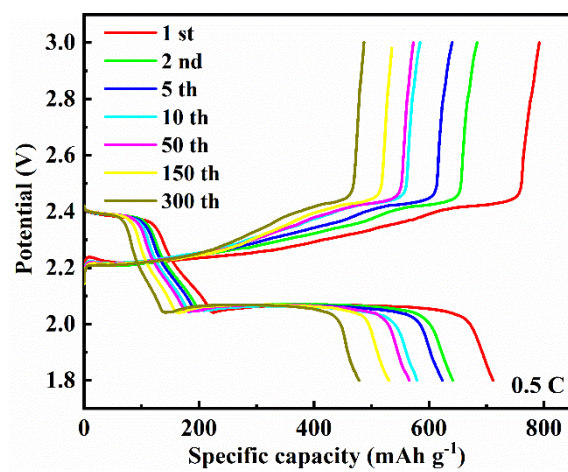

**Figure S3.** The charge-discharge curve of LSBs used electrolyte with 0% TDA+TFSI additive in different cycle, the current density is 0.5 C.
